# Alpha-Class Glutathione S-Transferases in Wild Turkeys (*Meleagris gallopavo*): Characterization and Role in Resistance to the Carcinogenic Mycotoxin Aflatoxin B<sub>1</sub>

Ji Eun Kim<sup>1‡</sup>, Brett R. Bunderson<sup>1</sup>, Amanda Croasdell<sup>1</sup>, Kent M. Reed<sup>2</sup>, Roger A. Coulombe Jr.<sup>1\*</sup>

**1** Department of Animal, Dairy, and Veterinary Sciences and Interdepartmental Graduate Toxicology Program, Utah State University, Logan, Utah, United States of America, **2** Department of Veterinary and Biomedical Sciences, College of Veterinary Medicine, University of Minnesota, St. Paul, Minnesota, United States of America

## Abstract

Domestic turkeys (*Meleagris gallopavo*) are one of the most susceptible animals known to the toxic effects of the mycotoxin aflatoxin B<sub>1</sub> (AFB<sub>1</sub>), a potent human hepatocarcinogen, and universal maize contaminant. We have demonstrated that such susceptibility is associated with the inability of hepatic glutathione S-transferases (GSTs) to detoxify the reactive electrophilic metabolite *exo*-AFB<sub>1</sub>-8,9-epoxide (AFBO). Unlike their domestic counterparts, wild turkeys, which are relatively AFB<sub>1</sub>-resistant, possess hepatic GST-mediated AFBO conjugating activity. Here, we characterized the molecular and functional properties of hepatic alpha-class GSTs (GSTAs) from wild and domestic turkeys to shed light on the differences in resistance between these closely related strains. Six alpha-class GST genes (*GSTA*) amplified from wild turkeys (Eastern and Rio Grande subspecies), heritage breed turkeys (Royal Palm) and modern domestic (Nicholas strain) turkeys were sequenced, and catalytic activities of heterologously-expressed recombinant enzymes determined. Alpha-class identity was affirmed by conserved GST domains and four signature motifs. All *GSTAs* contained single nucleotide polymorphisms (SNPs) in their coding regions: *GSTA1.1* (5 SNPs), *GSTA1.2* (7), *GSTA1.3* (3), *GSTA2* (3), *GSTA3* (1) and *GSTA4* (2). *E. coli*-expressed *GSTAs* possessed varying activities toward GST substrates 1-chloro-2,4-dinitrobenzene (CDNB), 1,2-dichloro-4-nitrobenzene (DCNB), ethacrynic acid (ECA), cumene hydroperoxide (CHP). As predicted by their relative resistance, livers from domestic turkeys lacked detectable GST-mediated AFBO detoxification activity, whereas those from wild and heritage birds possessed this critical activity, suggesting that intensive breeding and selection resulted in loss of AFB<sub>1</sub>-protective alleles during domestication. Our observation that recombinant tGSTAs detoxify AFBO, whereas their hepatic forms do not, implies that the hepatic forms of these enzymes are down-regulated, silenced, or otherwise modified by one or more mechanisms. These data may inform of possible molecular mechanisms of resistance to AFB<sub>1</sub>, and may also have the benefit of identifying genetic markers which could be used to enhance AFB<sub>1</sub> resistance in modern domestic strains.

**Citation:** Kim JE, Bunderson BR, Croasdell A, Reed KM, Coulombe RA Jr (2013) Alpha-Class Glutathione S-Transferases in Wild Turkeys (*Meleagris gallopavo*): Characterization and Role in Resistance to the Carcinogenic Mycotoxin Aflatoxin B<sub>1</sub>. PLoS ONE 8(4): e60662. doi:10.1371/journal.pone.0060662

**Editor:** Claire Wade, University of Sydney, United States of America

**Received:** November 19, 2012; **Accepted:** February 26, 2013; **Published:** April 16, 2013

**Copyright:** © 2013 Kim et al. This is an open-access article distributed under the terms of the Creative Commons Attribution License, which permits unrestricted use, distribution, and reproduction in any medium, provided the original author and source are credited.

**Funding:** This study was supported in part by National Resources Institute competitive grants 2004-35205-14217 and 2007-35205-17880 from the United States Department of Agriculture Cooperative State Research, Education, and Extension Service Animal Genome program ([http://www.csrees.usda.gov/funding/rfas/nri\\_rfa.html](http://www.csrees.usda.gov/funding/rfas/nri_rfa.html)), and by the Utah Agricultural Experiment Station (<http://uaes.usu.edu/>) where it is published as paper number 8482. The funders had no role in study design, data collection and analysis, decision to publish, or preparation of the manuscript.

**Competing Interests:** The authors wish to declare that a patent application (#13471776) has been submitted to the United States Patent Office for a diagnostic kit for disease resistance in turkeys. This does not alter the authors' adherence to all the PLOS ONE policies on sharing data and materials.

\* E-mail: roger@usu.edu

‡ Current address: Avian Research Centre, The University of British Columbia, Vancouver, British Columbia, Canada

## Introduction

Aflatoxin B<sub>1</sub> (AFB<sub>1</sub>), produced by *Aspergillus* fungi, is a ubiquitous dietary hepatotoxin and hepatocarcinogen, and a major public health concern worldwide, especially in locales where contaminated commodities, such as corn and peanuts, are consumed as a dietary staple [1,2]. The annual global burden of human hepatocellular carcinoma caused by AFB<sub>1</sub> is as high as 155,000 cases, with most occurring in sub-Saharan Africa, Southeast Asia and China [3]. Aflatoxin B<sub>1</sub> was discovered in the early 1960s as the principal etiological agent of 'Turkey X Disease' responsible for the deaths of poultry throughout Europe as a result of contaminated peanut-based meal [1,4,5]. There are considerable species-specific differences with respect to susceptibility to the toxic effects of AFB<sub>1</sub>, and domestic turkeys (*Meleagris*

*gallopavo*) are one of the most susceptible species known. Because of their extreme sensitivity, turkeys have been posited as effective surrogates to study AFB<sub>1</sub> susceptible human populations [6].

The mycotoxin AFB<sub>1</sub> is not toxic *per se*, but requires enzymatic "bioactivation" by hepatic cytochromes P450 (P450s) that catalyze the formation of the electrophilic, carcinogenic and mutagenic intermediate the aflatoxin B<sub>1</sub>-8,9-epoxide (AFBO) [2,6]. Turkeys bioactivate AFB<sub>1</sub> primarily by high-efficiency P450s 1A5 and 3A37 which we have recently cloned, sequenced and functionally characterized [6–8]. At pharmacological AFB<sub>1</sub> concentrations, P450 1A5 is responsible for more than 98% of the bioactivation in turkey liver [6].

In humans and most animals, the major AFB<sub>1</sub> detoxification route is via conjugation of the AFBO to endogenous glutathione (GSH) catalyzed by the classical detoxification enzymes glutathi-

one S-transferases (EC 2.5.1.18: GSTs). This family of multifunctional proteins is involved in phase II metabolism and detoxification of electrophilic xenobiotics such as anti-cancer drugs, chemical carcinogens and environmental pollutants [9,10]. While mice efficiently bioactivate AFB<sub>1</sub>, they are remarkably AFB<sub>1</sub>-resistant owing to the expression of the A3 subunit (mGSTA3) which has high catalytic activity toward AFBO [11]. GSTA3 knockout mice are exquisitely sensitive to the toxic and genotoxic effects of AFB<sub>1</sub> compared to the wild type [12] affirming the centrality of GSTs in species susceptibility toward AFB<sub>1</sub>. Current consensus is that efficiency of GST conjugation is a principal “rate-limiting” determinant for AFB<sub>1</sub> action in individuals and species regardless of the efficiency of AFB<sub>1</sub> bioactivation [13]. Studies in our laboratory have consistently demonstrated that GSTs from the livers of domestic turkeys have little or no AFBO affinity activity toward AFB<sub>1</sub>, a condition postulated as an important mechanism for their extreme sensitivity [2,14–16]. Comparative toxicology studies have shown that wild turkeys are substantially more resistant to AFB<sub>1</sub> compared to domestic turkeys [17]. Reflecting this relative resistance, livers from wild turkeys, unlike their domestic counterparts, possess functional, AFBO-detoxifying GSTs [18]. It is possible that AFB<sub>1</sub>-protective GST alleles were inadvertently lost through years of intensive breeding, and industry consolidation to produce the modern domestic turkey. Indeed, it has been reported that similar breeding pressures have resulted in a marked loss of rare alleles and genetic diversity of SNPs in commercial breeds of chickens [19].

Domestic turkeys possess six alpha-class GST genes (*tGSTAs*) the homologues to AFB<sub>1</sub>-protective GSTAs in mice and in other species [20,21]. Unlike the hepatic forms of turkey GSTs, which show no detectable AFBO-trapping ability, all recombinant and heterologously-expressed *tGSTAs* possessed measurable and comparable AFBO-conjugating activity; further, there is no apparent correlation between individual amino acid residues and AFBO-conjugation activity among the *tGSTAs* [21]. The purpose of this study was to determine whether there are genotypic and functional differences of hepatic *GSTAs* cloned, and heterologously expressed from two subspecies of wild turkeys, a “heritage” line and, domestic birds that might shed light on molecular evolution of this important disease-protective gene, as well as on the molecular mechanisms of resistance to AFB<sub>1</sub>.

## Methods

### Tissues

Fresh livers were obtained from two subspecies of wild turkey: the Eastern wild (“EW”; *Meleagris gallopavo silvestris*) common to the eastern half of the United States; and the Rio Grande wild (“RGW”; *M.g. intermedia*) native to the central and southern plains states, western Texas, and northeastern Mexico [22]. Livers from Royal Palm (“RP”), a heritage breed developed in the early twentieth century [22], were included as a representative of an early domesticated breed. These livers were flash-frozen in liquid N<sub>2</sub>, shipped overnight in dry ice, and stored at –80°C until use. Livers of modern domestic turkeys (“DT”; *M. gallopavo*; Nicholas strain) were provided by Moroni Feed Cooperative (Moroni, UT). Swiss-Webster mice were obtained from Charles River Laboratories (Wilmington, MA, USA) through Laboratory Animal Research Center, Utah State University and were given a diet containing 0.75% butylated hydroxyanisole (BHA) using corn oil for 14 days. Animals were cared for under institutional approval in an AAALAC-accredited facility. Utah State University’s Animal Use and Care Committee approved all procedures involving animal care, euthanasia and tissue collection.

### RNA Extraction and Gene Amplification

Liver samples were homogenized using a Polytron (Brinkman, Westbury, NY) and mRNA was extracted using Oligotex direct mRNA kit (QIAGEN, Valencia, CA). The first strand cDNA was synthesized using SuperScript first-strand synthesis kit for RT-PCR (Invitrogen, Carlsbad, CA). For amplification of the coding region of *GSTA* fragments, PCR was performed using pfuUltra high fidelity DNA polymerase (Stratagene, La Jolla, CA) with gene-specific primers (Table 1). The PCR profile was 2 min at 94°C, 30 s at 94°C, 30 s at annealing temperature 56–60°C (25 cycles), and 90 s at 72°C, followed by a final extension at 72°C for 10 min. Full-length cDNA of each *tGSTA* was subcloned into Zero Blunt PCR II vector (Invitrogen, Carlsbad, CA) and sequenced at Utah State University’s core facility. Sequence data were analyzed using Lasergene SeqMan II software (DNASTAR Inc., Madison, WI).

### Phylogenetic Analysis

Both nucleotide and amino acid sequences of the turkey GSTAs (EW, RGW, RP and DT), and chicken alpha class GSTs (cGSTAs) were aligned and compared using the phylogenetic and molecular evolutionary analysis software, MEGA version 5.05 (<http://www.megasoftware.net/mega.php>) [23]. Bootstrapped neighbor-joining method was used for phylogenetic reconstruction. A total of 500 bootstrap replicates were employed.

### Expression and Purification of Recombinant GSTAs in *E. coli*

Vector constructs for PCR were assembled using a strategy similar to that used in a previous study [21] for expression of six *GSTA* genes from domestic turkey (DT), which are also used here for comparison purposes. Sequencing revealed numerous allelic redundancies, so the following unique expression vectors were constructed **pGSTA1.1**: EW (= RP), DT (= RGW), **pGSTA1.2**: EW, RGW, RP, DT, **pGSTA1.3**: RGW (= EW = RP), DT, **pGSTA2**: RGW, RP (= EW), DT, **pGSTA3**: RP (= EW), DT (= RGW), **pGSTA4**: EW, RGW, DT (= RP). To express His-tag fusion GSTA protein in *E. coli*, gene-specific primers with two restriction sites, *Nde*I at 5′-end (*Bam*HI at 5′-end for *tGSTA4*) and *Xho*I at 3′-end, were designed to amplify the open reading frame (ORF) fused c-terminal 6X His tag to generate recombinant GSTA proteins using proofreading DNA polymerase (Table 2). The PCR profile was: 2 min at 94°C, 30 s at 94°C, 30 s at 60–63°C (25 cycles) and 1 min and 40 s at 72°C, followed by a final extension for 8 min at 72°C. Gel-purified gene PCR fragments were cloned into bacterial expression vector pET21α (Novagen, San Diego, CA), and then were transformed into *E. coli* strain BL21 (DE3). Colonies were inoculated to 30 mL of LB media containing ampicillin (100 mg/L) and grown overnight at 37°C. The starter culture was then inoculated (1:100 dilution) into 500 mL of LB containing ampicillin (100 mg/L), and incubated at 37°C until OD<sub>600</sub> reached 0.6–0.65 with shaking (250 rpm). After 3 h induction with 0.4 mM isopropyl-β-thiogalactopyranoside (IPTG), *E. coli* cells with the recombinant GSTA proteins were harvested and pelleted by centrifugation (5,000 g) at 4°C. Purification was by a modification of the manufacturer’s (QIAGEN, Valencia, CA) instructions as follow: Harvested cell pellets were resuspended in lysis buffer (2.5 mM NaH<sub>2</sub>PO<sub>4</sub>, 300 mM NaCl, 10 mM imidazole, pH 8.0), disrupted by sonication (Fisher 60 Sonic, Fischer Scientific, Pittsburgh, PA) and lysates were centrifuged at 10,000 g for 50 min at 4°C. The clear supernatant was saved for purification. NI-NTA agarose was added to the supernatant and mixed by orbital shaker at 200 rpm for 60 min at

**Table 1.** Summary of primers used to amplify the open reading frame of Alpha-class *GST* fragments from wild and heritage turkey hepatic cDNA.

| Gene           | Size (bp) | Gene specific primers                                                                   | GenBank accession |
|----------------|-----------|-----------------------------------------------------------------------------------------|-------------------|
| <i>GSTA1.1</i> | 663       | F: 5'-ATGTCTGGGAAGCCAGTTCTG-3'<br>R: 5'-TCAATGGAAAATTGCCATCA-3'                         | GQ228399          |
| <i>GSTA1.2</i> | 666       | F: 5'-ATGTCTGGGAAGCCAGTTCTG-3'<br>R: 5'-TCAGTGGAAAATTGCTATCACACT-3'                     | GQ228400          |
| <i>GSTA1.3</i> | 666       | F: 5'-ATGTCTGGGAAGCCAGTTCT-3'<br>R: 5'-TCAACTGAAAATTGCCAGCAG-3'                         | GQ228401          |
| <i>GSTA2</i>   | 669       | F: 5'-ATGGCGGAGAAACCTAAGCTTCACTATACCA-3'<br>R: 5'-TAATGTGAGGAAAATATTCAAGTTCTAAGGCCGC-3' | GQ228402          |
| <i>GSTA3</i>   | 672       | F: 5'-ATGTCGGAGAACCCAGGCTCACCTA-3'<br>R: 5'-TCAGTCTAGCTTAAAAATTTTCATCACAGTTGC-3'        | GQ228403          |
| <i>GSTA4</i>   | 690       | F: 5'-ATGGCTGCAAAACCTGTACTCTACTAC-3'<br>R: 5'-CTAATTGG TTTTACATCATAATACATCCGG-3'        | GQ228404          |

doi:10.1371/journal.pone.0060662.t001

4°C. This mixture was loaded to the polypropylene column and the resins were washed twice by washing buffer (50 mM NaH<sub>2</sub>PO<sub>4</sub>, 2 M NaCl, 10 mM imidazole, pH 8.0, 50% glycerol, 1% Tween 20) and were eluted four times with elution buffer (50 mM NaH<sub>2</sub>PO<sub>4</sub>, 2 M NaCl, 250 mM imidazole, pH 8.0, 50% glycerol, 1% Tween 20). All eluates were pooled and used for SDS-PAGE, immunoblots and enzyme assays. Protein was then measured using the Bradford Protein Assay Kit (Bio-Rad, Hercules, CA).

### SDS-PAGE and Immunoblotting

Purified recombinant tGSTA proteins were visualized by Coomassie Brilliant Blue staining on a 15% Tris-HCl Ready

Gel (Bio-Rad, Hercules, CA). The SDS-PAGE gel was blotted onto PVDF membrane and blocked with 2% nonfat milk powder in TBST buffer (20 mM Tris-HCl, pH 7.6, 137 mM NaCl and 0.1% Tween 20) for 1 h at room temperature. After washing, the membrane was incubated with anti-His probe (1:200) overnight at 4°C. On the next day, the membrane was incubated with bovine anti-mouse IgG HRP-conjugated secondary antibody (1:8,000) for 1 h at room temperature and washed 5 times with TBST buffer for 60 min. Images were visualized by chemiluminescence using the Luminol reagent system and Cruz Marker TM molecular weight standard (Santa Cruz Inc, Santa Cruz, CA). Immunoblots were archived using a Nucleovision E20 Imaging Workstation (Nucleotech, Hayward, CA).

### Secondary Structures of Alpha-class GSTs

GenBank accession numbers of GSTA proteins (A1.1, A1.2, A1.3, A2, A3, A4) were assigned as follows: Eastern Wild (AET31416, AET31413, AET31410, AET31407, AET31404, AET31401), Rio Grande Wild (AET31417, AET31414, AET31411, AET31408, AET31405, AET31402), Royal Palm (AET31418, AET31415, AET31412, AET31409, AET31406, AET31403). Putative amino acid sequences of all GSTAs were aligned using ClustalW 2.0.12 (<http://www.ebi.ac.uk/Tools/clustalw2/>). Predictive secondary structures in wild and heritage turkey were compared with alpha-class GSTs of domestic turkey [20,21] using PSIPRED Protein Structure Prediction Server software program (<http://bioinf.cs.ucl.ac.uk/psipred/>).

### Preparation of Hepatic Cytosols

Activities of recombinant turkey GSTAs were compared to those of their respective hepatic cytosols. Turkey liver cytosols were prepared as previously described [2]. All steps were at 4°C. Frozen liver was homogenized using a Polytron (Brinkman, Westbury, NY) in 2 vol of cold lysis buffer (50 mM Tris, 1 mM EDTA, 0.25 M sucrose, 150 mM KCl, 20 mM BHT and 200 mM PMSF buffer, pH 7.4). The homogenate was centrifuged at 600 g and then at 10,000 g for 10 min each. The supernatant was centrifuged at 16,000 g for 10 min and then was further centrifuged at 105,000 g for 1 h. The final supernatant (cytosols) was collected and stored at -80°C until use. As a comparison, liver cytosolic fraction from butylated hydroxyanisole (BHA)-

**Table 2.** Primers with restriction sites for cloning and the 6X His-recombinant constructs of alpha-class *GSTAs* from wild and heritage turkey cDNA.

| Gene           | Construct | Primer sequences                                                                                  |
|----------------|-----------|---------------------------------------------------------------------------------------------------|
| <i>GSTA1.1</i> | pGSTA1.1  | F: 5'-ATAGTCGCTCATATGTCTGGGAAGCCAGTTCTG-3'<br>R: 5'-AAGCGAGGCTCGAGATGGAAAATTGCCATCAGACTT-3'       |
| <i>GSTA1.2</i> | pGSTA1.2  | F: 5'-TAGTCGCTCATATGTCTGGGAAGCCAGTTCT-3'<br>R: 5'-ACGAGGCTCGAGGTGGAAAATTGCTATCAC-3'               |
| <i>GSTA1.3</i> | pGSTA1.3  | F: 5'-GTAGTCGCTCATATGTCTGGGAAGCCAGTTCT-3'<br>R: 5'-AGACCGGCTCGAGACTGAAAATTGCCAGCA-3'              |
| <i>GSTA2</i>   | pGSTA2    | F: 5'-TTGCCACATATGGCGGAGAAACCTAAGCTTCA-3'<br>R: 5'-CGACCGGCTCGAGGAACTGAATATTTCTCAC-3'             |
| <i>GSTA3</i>   | pGSTA3    | F: 5'-TATCATAATATGTCTGGGAGAACCCAGGCTCAC-3'<br>R: 5'-CGACCGGCTCGAGGCTAGCTTAAAAATTTTCATCAC-3'       |
| <i>GSTA4</i>   | pGSTA4    | F: 5'-CTACGAGGATCCATGGCTGCAAAACCTGTACTCTACT-3'<br>R: 5'-GGCCCGCTCGAGATTTGGTTTTACATCATAATACATCC-3' |

doi:10.1371/journal.pone.0060662.t002

induced Swiss Webster mice, the GSTs from which are reported to have the highest known conjugation activity due to the presence of mGSTA3 with high affinity toward AFBO [13] were included as a positive control, by methods we have published [21].

### Prototype GST Enzymatic Activities

Specific enzyme activities of *E. coli*-expressed GSTAs proteins and hepatic cytosolic GSTs were assayed for their conjugation activities toward substrates 1-chloro-2,4-dinitrobenzene (CDNB), 1,2-dichloro-4-nitrobenzene (DCNB), ethacrynic acid (ECA) [24,25] and cumene hydroperoxide (CHP) [26,27], which are used as prototype substrates to probe GST activities in various tissues. Because of ORF sequence redundancies, enzyme activities were determined only from those heterologously expressed proteins with unique sequences: GSTA1.1 (EW), GSTA1.2 (EW, RGW, RP), GSTA1.3 (RGW), GSTA2 (RGW, RP), GSTA3 (RP) and GSTA4 (EW, RGW). Heterologously-expressed GSTAs cloned from domestic turkey (DT) [21] were included as controls in all enzyme assays. Conditions of all assays were optimized in a final volume 1 mL containing 100 mM potassium phosphate buffer at room temperature (25°C) using spectrophotometer (Thermo Scientific, Madison, WI). Substrate and GSH concentrations optimized for each assay (run for 2 min) were: (a) 1 mM CDNB, 1 mM GSH,  $\Delta A_{340}$  nm (Extinction coefficient:  $9.6 \text{ mM}^{-1} \text{ cm}^{-1}$ ), buffer pH 6.5 (b) 1 mM DCNB, 5 mM GSH,  $\Delta A_{345}$  nm ( $8.5 \text{ mM}^{-1} \text{ cm}^{-1}$ ), buffer pH 7.5 (c) 0.2 mM ECA, 0.25 mM GSH,  $\Delta A_{270}$  nm ( $5 \text{ mM}^{-1} \text{ cm}^{-1}$ ), buffer pH 6.5, and (d) glutathione peroxidase activity with (CHP) as substrate was determined with 1.2 mM CHP, 2 mM GSH, 1 U glutathione reductase, 0.2 mM NADPH,  $\Delta A_{340}$  nm ( $6.22 \text{ mM}^{-1} \text{ cm}^{-1}$ ) and buffer pH 7.0.

### Determination of GST-mediated AFBO Conjugation Activity

Turkey liver microsomes and cytosolic fractions were prepared as previously described [14]. Glutathione S-transferase-mediated AFBO conjugation activity was measured for turkey hepatic GSTs [2,16], and for *E. coli*-expressed GSTAs [21]. Turkey liver microsome (~ 400  $\mu\text{g}$  total protein) used to generate AFBO, were reacted with 100  $\mu\text{M}$  AFB<sub>1</sub> in spectral grade dimethyl sulfoxide, 2 mM NADPH, 5 mM GSH, and turkey cytosol (~ 800  $\mu\text{g}$  total protein) containing GST [2,21,28] or *E. coli*-expressed GSTAs (~ 2  $\mu\text{g}$  total protein). This mixture was incubated in AFBO trapping buffer (5 mM MgCl<sub>2</sub>, 25 mM KCl, 0.25 mM sucrose and 80 mM potassium phosphate, pH 7.6) to give a final volume of 250  $\mu\text{L}$ , incubated at 37°C for 20 min with gentle shaking and stopped by adding 250  $\mu\text{L}$  of cold MeOH spiked with 24  $\mu\text{M}$  aflatoxin G<sub>1</sub> (AFG<sub>1</sub>) as an internal HPLC standard. The samples were stored overnight at -20°C to facilitate protein precipitation and then centrifuged at 13,000 g for 10 min. The supernatants were filtered through a 0.2  $\mu\text{M}$  nylon membrane (Millipore, Billerica, MA) and 100  $\mu\text{L}$  was injected into the HPLC. Metabolites were separated on a Shimadzu LC system (Shimadzu, Pleasanton, CA), equipped with a model LC-20AD pump, a model SPD-20AV UV/vis detector, and an Econosphere C18 (150 mm  $\times$  4.6 mm) column (Grace Davison Discovery Sciences, Deerfield, IL) kept at 4°C. The elution of the peaks was monitored by UV absorbance ( $\lambda = 365 \text{ nm}$ ). Mobile phases were used: solvent A was H<sub>2</sub>O adjusted to pH 3.65 with phosphoric acid and solvent B with 5% tetrahydrofuran in methanol. Amounts of metabolite formation were calculated by establishing calibration curves between the peak areas in the chromatograms and the amount of metabolite injected, using an authentic *exo*-AFB<sub>1</sub>-GSH standard.

### Statistical Analysis

Enzyme activities of hepatic cytosolic and recombinant GSTAs were compared and analysed by ANOVA and post hoc LSD for mean separation using SAS/STAT software with a level of significance set at  $P < 0.05$ .

## Results

### Single Nucleotide Polymorphisms (SNPs)

The full-length cDNAs of six alpha-class GST genes (*GSTAs*) were isolated and cloned from the liver of two wild turkey subspecies (Eastern Wild: EW and Rio Grande Wild: RGW) and one heritage turkey breed (Royal Palm: RP). Each *GSTA* was identical in length to the corresponding homologs from domestic turkey (DT) (*GSTA1.1*, 663 bp; *GSTA1.2*, 666 bp; *GSTA1.3*, 666 bp; *GSTA2*, 669 bp; *GSTA3*, 672 bp; *GSTA4*, 690 bp) (Figures S1, S2, S3, S4, S5, S6). Nomenclature for wild and heritage turkey cytosolic GSTs were based on identities of the primary gene structures to the domestic homologs, and were assigned the following GenBank accessions: Eastern wild (*M. g. silvestris*), EWtGSTA1.1–EWtGSTA4: JN575076–JN575081; Rio Grande wild (*M.g.intermedia*), RGWtGSTA1.1–RGWtGSTA4: JN575082–JN575087; Royal Palm heritage breed, RPtGSTA1.1–RPtGSTA4: JN575088–JN575093.

Sequencing revealed numerous putative SNPs within the protein coding region of *GSTAs* among the turkeys examined. As can be graphically seen in Figure 1, the allelic diversity as measured by frequency of SNPs in the turkeys investigated here - EW, RGW and RP - differed among the six *GSTAs* with respect to modern domestic turkeys (DT). The greatest allelic diversity in *GSTA* occurred in *GSTA1.1* and *GSTA1.2*, in which EW and RP turkeys contained 5 SNPs each, and 2, 6 and 4 SNPs in *GSTA1.2* for EW, RGW and RP, respectively. Sequences of *GSTA1.1* and *GSTA3* of RGW were identical to that of DT. The *GSTA1.3* variant in EW, RGW and RP possessed 3 SNPs compared to DT. There was only 1 SNP in *GSTA3* from EW and RP turkeys, and 2 and 1 SNP in *GSTA4* from EW and RGW, respectively, indicating that these genes possessed generally lower allelic variation. The identities and positions of mutations and predicted amino acids resulting from all SNPs are shown in Table 3. Four of the *GSTA* isoforms possessed the following encoding point mutations: *GSTA1.1*: Ser/Thr<sup>12</sup>, Ser/Phe<sup>49</sup> and Thr/Ile<sup>190</sup>; *GSTA1.2*: Cys/Ser<sup>49</sup>, Leu/Phe<sup>140</sup> and Gly/Trp<sup>166</sup>; *GSTA1.3*: Pro/Ser<sup>172</sup> and Ser/Ala<sup>125</sup> in *GSTA3*. The SNPs of *GSTA2* and *GSTA4* encoded silent mutations. Although one hallmark of adaptive evolution is a greater rate of substitution at non-synonymous than at synonymous sites, [29], we found that these mutations did not result in large differences of enzyme activities among *GSTA* isoforms.

### GST Phylogeny

Phylogenetic trees of the turkey *GSTAs* sequenced in this study (EW, RGW, heritage RP and domestic turkey DT) and those of chicken were constructed to illustrate the relatedness of the amplified *GSTAs* among these avian taxa (Figure 2). Clustering of nucleotide and amino acid sequences resulted in trees with identical overall topologies. In all cases the *GSTA* sequences of wild and heritage birds clustered with their domestic turkey homologs, confirming amplification of the target loci. On average, amino acid sequences of *GSTAs* from turkeys and chicken orthologues were 95% similar with the exception of chicken *GSTA1* (cGSTA1) and domestic turkey

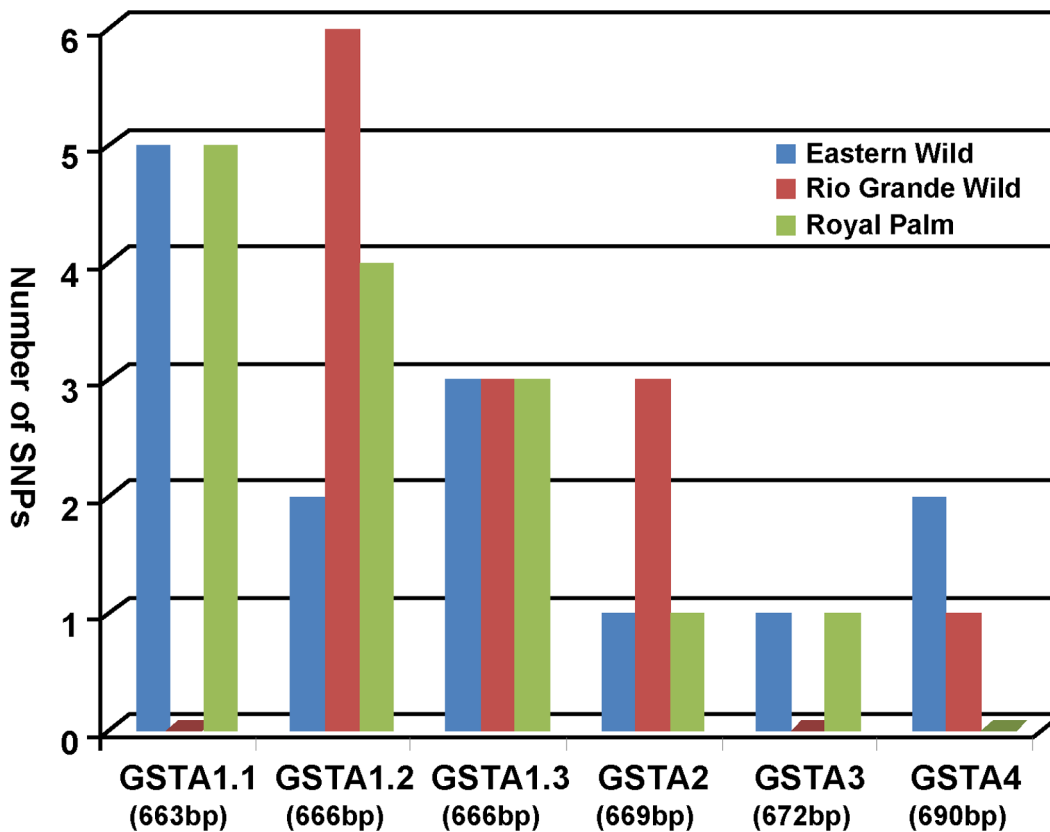

**Figure 1. Genetic diversity of six Alpha class GST genes in four subspecies of turkeys.** Domestic turkey was used for the reference to compare three subspecies. The Figure 1 shows the number of SNPs between domestic turkey and wild/heritage turkey. **DT:** domestic turkey, **EW:** Eastern Wild, **RGW:** Rio Grande Wild, **RP:** Royal Palm. Parenthesis ( ): the size of alpha class GST genes. The alpha class GST gene in subspecies showed the same nucleic acid sequences: *tGSTA1.1*: DT=RGW, EW=RP; *tGSTA1.3*: EW=RGW=RP; *tGSTA2*: EW=RP; *tGSTA3*: DT=RGW, EW=RP; *tGSTA4*: DT=RP. *tGSTA1.2* showed the most diversity. doi:10.1371/journal.pone.0060662.g001

*tGSTA1.2* (81%), *tGSTA1.3* (82%) [20,21]. Clustering of the turkey and chicken sequences reflects the duplication of *GSTAs* prior to divergence of the two avian species.

### Secondary Structure of Alpha-class GSTs

The amino acid sequences of wild and heritage turkey GSTAs were 98–100% similar to those of domestic turkeys. Like domestic turkeys, the open reading frame (ORF) of each gene was predicted to encode proteins in the range of 220–229 aa (25–26 kDa). Multiple sequence alignments comparing the amino acid residues as well as the secondary structure of GSTAs of the various turkey strains to those of revealed that all GSTAs contain a typical GST structure, consisting of two distinct conserved domains and four alpha-class signature motifs (Figure 3). Two domains consist of a thioredoxin-like N-terminal domain and a helical C-terminal domain. Like domestic breeds [20], all *GSTAs* from wild and heritage turkeys possess ten  $\alpha$ -helices and five  $\beta$ -strands; N-terminal domain contains  $\alpha$ 1- $\beta$ 3/ $\beta$ 1-4 and C-terminus contains  $\alpha$ 4- $\alpha$ 10/ $\beta$ 5. These alignments showed that all GSTAs possess four alpha-class signature motifs, except that *GSTA1.1* lacked one motif (PVxEKVLKxHGxxxL) in residues 134–148 of the C-terminal domain, which did not appear to have a discernible effect on the catalytic activities of this form toward GST substrates (Table 4).

### Expression and Identification of Recombinant GSTA Proteins

Recombinant 6X His-tagged clones in pET21 $\alpha$  (**pGSTA1.1**: EW DT, **pGSTA1.2**: EW, RGW, RP, DT, **pGSTA1.3**: RGW, DT, **pGSTA2**: RGW, RP, DT, **pGSTA3**: RP, DT, **pGSTA4**: EW, RGW, DT) were expressed in *E. coli* BL21 (DE3). The molecular mass of 6X His-tagged recombinant GSTAs were predicted as follows: *GSTA1.1*:26.3 kDa; *GSTA1.2*:26.4 kDa; *GSTA1.3*:26.5 kDa; *GSTA2*:26.7 kDa; *GSTA3*:26.7 kDa; and *GSTA4*:28.8 kDa. A series of affinity-purified 6X His-tagged *GSTA1.2* recombinant proteins from domestic, Eastern Wild, Rio Grande Wild and Royal Palm heritage separated on SDS/PAGE revealed the expected band with a MW of 28 kDa (Figure 4). Protein bands of the same mass were also observed in immunoblots (Figure 5). Other GSTAs had a similar appearance on SDS/PAGE and in immunoblots (data not shown).

### GST-specific Catalytic Activities of Recombinant GSTAs and Hepatic Cytosolic Fractions

Activities of cDNA-expressed recombinant GSTAs as well as their hepatic cytosolic forms toward conjugation of CDNB, DCNB, ECA and CHP were measured and compared under standard conditions (Table 4). All recombinant GSTA proteins possessed detectable enzymatic activities toward these prototype substrates, with few discernible trends where one recombinant protein consistently showed either high or low conjugation activity.

**Table 3.** Synonymous and non-synonymous SNPs in GSTM genes and point mutations in wild, heritage, and domestic turkeys.<sup>1</sup>

| Group                      | No SNPs  | Enzyme             | Nucleic acid position (bp)                   | Amino acid position (aa) <sup>2</sup>                           |
|----------------------------|----------|--------------------|----------------------------------------------|-----------------------------------------------------------------|
|                            |          |                    | 34 72 146 327 569                            | <b>12 24 49 109 190</b>                                         |
| <i>GSTA1.1</i><br>(663 bp) | <b>5</b> | <b>tGSTA1.1</b>    | T A C C C                                    | Ser Ala Ser Asn Thr                                             |
|                            |          | <b>EWtGSTA1.1</b>  | A G T T T                                    | Thr Ala Phe Asn Ile                                             |
|                            |          | <b>RGWtGSTA1.1</b> | T A C C C                                    | Ser Ala Ser Asn Thr                                             |
|                            |          | <b>RPtGSTA1.1</b>  | A G T T T                                    | Thr Ala Phe Asn Ile                                             |
| <i>GSTA1.2</i><br>(666 bp) | <b>7</b> | <b>tGSTA1.2</b>    | 146 243 402 420 432 496 606<br>G C A G G G C | <b>49 81 134 140 133 166 202</b><br>Cys Leu Pro Leu Gly Gly Ser |
|                            |          | <b>EWtGSTA1.2</b>  | G T A G G G T                                | Cys Leu Pro Leu Gly Gly Ser                                     |
|                            |          | <b>RGWtGSTA1.2</b> | C T G C A T C                                | Ser Leu Pro Phe Gly Trp Ser                                     |
|                            |          | <b>RPtGSTA1.2</b>  | G T A G A T T                                | Cys Leu Pro Leu Gly Trp Ser                                     |
| <i>GSTA1.3</i><br>(666 bp) | <b>3</b> | <b>tGSTA1.3</b>    | 487 514 558<br>T C C                         | 163 <b>172</b> 186<br>Thr Pro Ala                               |
|                            |          | <b>EWtGSTA1.3</b>  | C T A                                        | Thr Ser Ala                                                     |
|                            |          | <b>RGWtGSTA1.3</b> | C T A                                        | Thr Ser Ala                                                     |
|                            |          | <b>RPtGSTA1.3</b>  | C T A                                        | Thr Ser Ala                                                     |
| <i>GSTA2</i><br>(669 bp)   | <b>3</b> | <b>tGSTA2</b>      | 204 255 636<br>T T G                         | 68 85 212<br>Thr Asp Ser                                        |
|                            |          | <b>EWtGSTA2</b>    | T T A                                        | Thr Asp Ser                                                     |
|                            |          | <b>RGWtGSTA2</b>   | C C A                                        | Thr Asp Ser                                                     |
|                            |          | <b>RPtGSTA2</b>    | T T A                                        | Thr Asp Ser                                                     |
| <i>GSTA3</i><br>(672 bp)   | <b>1</b> | <b>tGSTA3</b>      | 373<br>T                                     | <b>125</b><br>Ser                                               |
|                            |          | <b>EWtGSTA3</b>    | G                                            | Ala                                                             |
|                            |          | <b>RGWtGSTA3</b>   | T                                            | Ser                                                             |
|                            |          | <b>RPtGSTA3</b>    | G                                            | Ala                                                             |
| <i>GSTA4</i><br>(690 bp)   | <b>2</b> | <b>tGSTA4</b>      | 219 507<br>C A                               | 73 169<br>Asn Glu                                               |
|                            |          | <b>EWtGSTA4</b>    | T G                                          | Asn Glu                                                         |
|                            |          | <b>RGWtGSTA4</b>   | C G                                          | Asn Glu                                                         |
|                            |          | <b>RPtGSTA4</b>    | C A                                          | Asn Glu                                                         |

<sup>1</sup>Abbreviations are: t=domestic turkey; EW=Eastern Wild; RGW=Rio Grande Wild; RP=Royal Palm standard, or "heritage" turkey.

<sup>2</sup>Amino acid positions of point mutations are in bold font.

doi:10.1371/journal.pone.0060662.t003

However, the highest activity toward CDNB was observed for tGSTA1.2 cloned from domestic turkey and the GSTA3 allele cloned and expressed from RP had substantially higher ECA and CHP activity than all others. As we have previously observed in GSTA1.1 from domestic turkey [20,21], all GSTA1.1 isoforms lack a signature motif (PVxEKVLKxHGxxxL; residues 134–148) in the C-terminal domain. However, this did not appear to discernibly affect enzyme activity of these recombinant, expressed isoforms. Indeed, the specific enzyme activities of GSTA1.1 were well within the range of that seen from other isoforms.

Activities toward such prototype substrates are important in confirming that expressed GSTs are catalytically active proteins. However, activities toward these substrates are not associated with that against specific substrates such as AFB<sub>1</sub>. When GST activity toward AFBO was measured all recombinant GSTAs possessed detoxification activity toward this *in situ* - generated reactive intermediate (Table 4). Recombinant GSTA1.1 and A1.3 from EW and RGW birds appeared to have the highest AFBO trapping activity. This is especially interesting given the absence of the motif

in residues 134–148 in the former protein. Unlike recombinant and expressed GSTs, there were significant differences in the conjugation activities of hepatic cytosols. While liver cytosols from EW, RGW, and RP turkeys had substantial AFBO trapping activity, the DT cytosols did not.

Liver cytosol from BHA-induced mice, which expresses high amounts of mGSTA3, the "gold standard" of AFBO-conjugating activity, possessed AFBO-conjugating activity 41, 44 and 26-fold greater than that in livers from EW, RP and RGW, respectively. The rate of AFBO conjugation measured in mouse liver was close to that published for similarly BHA-induced Swiss Webster mice [30].

## Discussion

Susceptibility of animals and humans to the toxic and carcinogenic properties of AFB<sub>1</sub> arises from a complex process involving a balance between P450-mediated bioactivation of AFBO, and the efficiency with which this reactive and toxic intermediate is detoxified, principally through GST conjugation

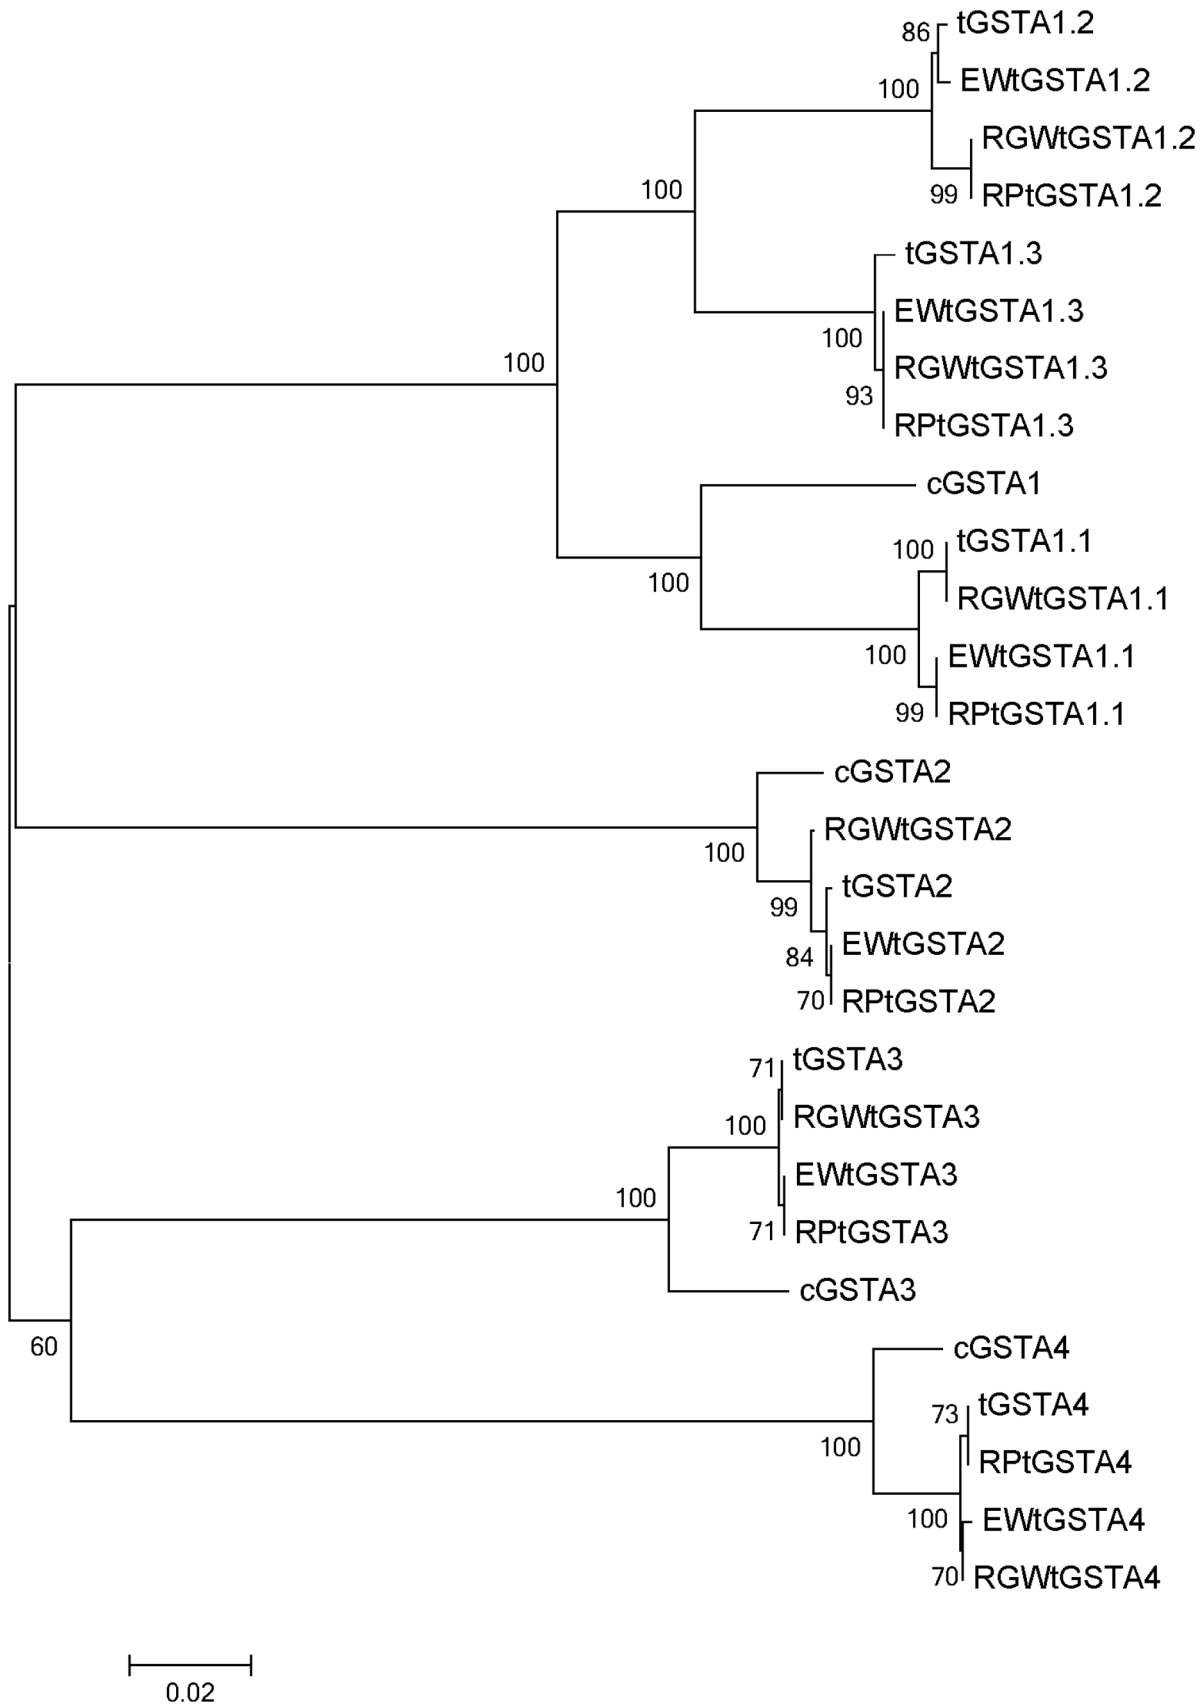

**Figure 2. Phylogenetic analysis of amino acid sequences of turkey GSTAs along with chicken GSTAs.** Genetic distance of GSTAs among wild (EWtGST: Eastern Wild, RGWtGST: Rio Grande Wild), heritage (RPtGST: Royal Palm) and domestic turkeys (tGST) and chicken alpha-class GST

(cGSTA) determined using the neighbor-joining method. Bootstrap supporting values are indicated at each node. The scale bar represents phylogenetic distance (substitution/site). Identical results were obtained when nucleotide sequences were used for alignment and phylogenetic analysis.  
doi:10.1371/journal.pone.0060662.g002

[11]. Among animal species studied to date, turkeys are one of the most susceptible [2,15,21]. In turkey liver, AFB<sub>1</sub> is rapidly metabolically activated to the putative toxic and carcinogenic intermediate AFBO, by high-efficiency cytochromes P450 1A5 [31] and P450 3A37 [6], though the former is responsible for >98% of bioactivation at pharmacological concentrations of AFB<sub>1</sub> in the liver [6]. Bioactivation by P450 s is a critical and requisite step for the toxicity of thousands of drugs and environmental chemicals. In the case of AFB<sub>1</sub>, it appears that the presence of hepatic GSTs with ability to catalytically conjugate GSH with

AFBO is the principal “rate-limiting” determinant for AFB<sub>1</sub> toxicity, regardless of the efficiency of AFB<sub>1</sub> bioactivation [13]. Studies in our laboratory have consistently shown that while livers from domestic turkeys have GST activity against prototype substrates, they are deficient in expression of GSTs with affinity activity toward AFB<sub>1</sub> [2,15,16]. Wild turkeys have been shown to be relatively AFB<sub>1</sub>-resistant [17,32], and the fact that livers from wild turkeys, unlike their closely-related domestic counterparts, possess functional AFBO-trapping GSTs, supports the view that GSTs are critical to AFB<sub>1</sub> susceptibility and resistance in animals.

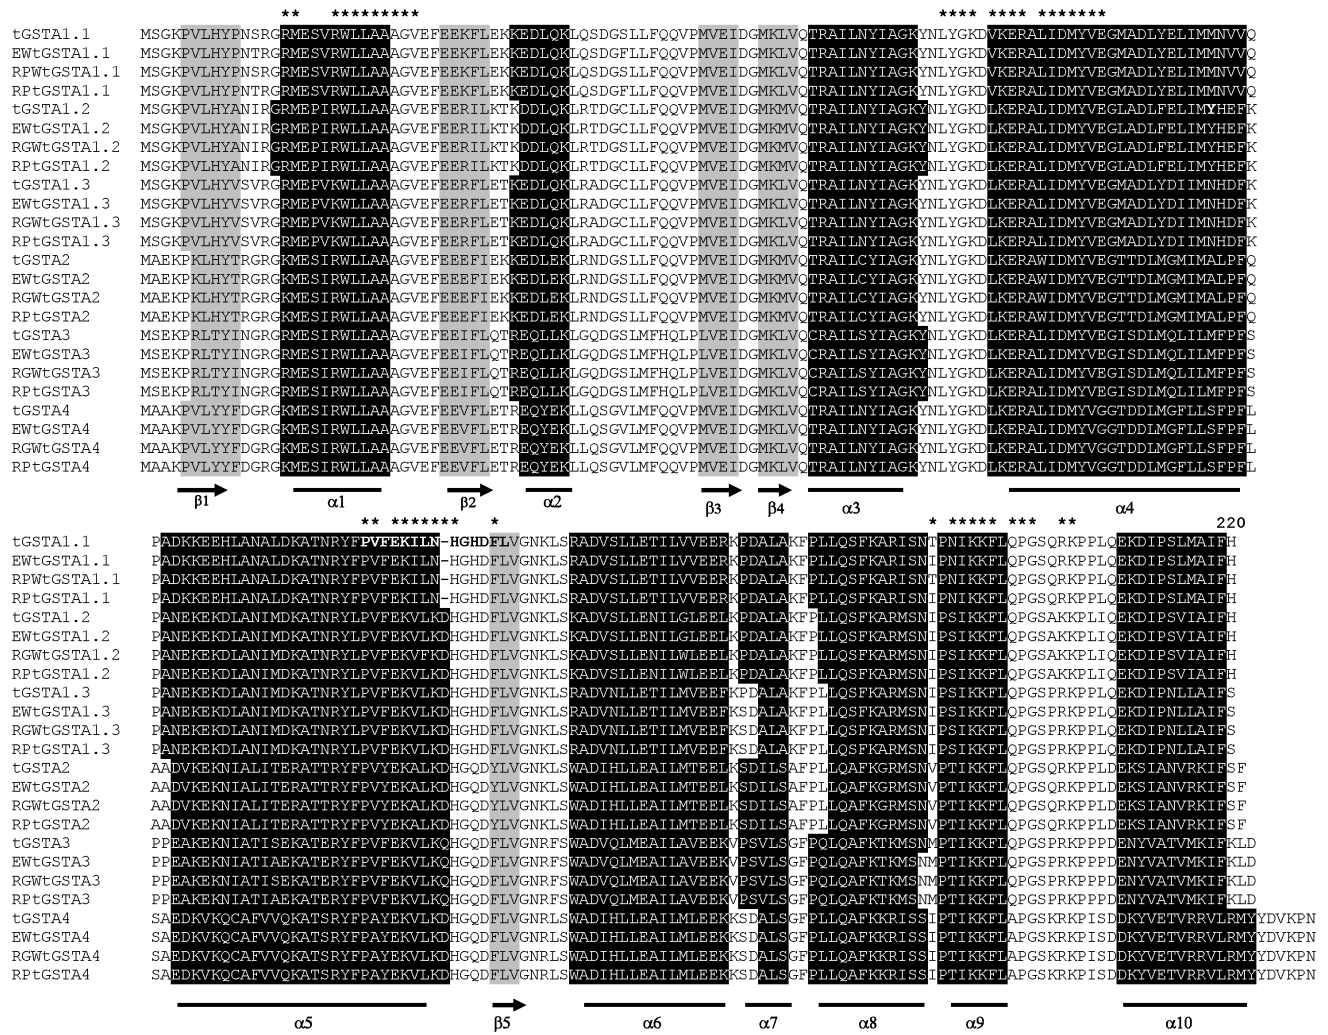

**Figure 3. Multiple amino acid sequence alignments of six alpha-class GSTs from the wild, heritage and domestic turkeys with alpha-class GSTs.** Underlines indicate alpha helices (black background) and arrows indicate beta strands (grey background). \* indicates alpha-class signature motifs and specific conserved residues. The sequences of amino acid are (species name, GenBank accession no.): tGSTA1.1 (*M. gallopavo*, ACU44693), tGSTA1.2 (*M. gallopavo*, ACU44694), tGSTA1.3 (*M. gallopavo*, ACU44695), tGSTA2 (*M. gallopavo*, ACU44696), tGSTA3 (*M. gallopavo*, ACU44697), tGSTA4 (*M. gallopavo*, ACU44698), EwtGSTA1.1 (*M. g. silvestris*, AET31416), EwtGSTA1.2 (*M. g. silvestris*, AET31413JN57077), EwtGSTA1.3 (*M. g. silvestris*, AET31410), EwtGSTA2 (*M. g. silvestris*, AET31407), EwtGSTA3 (*M. g. silvestris*, AET31404), EwtGSTA4 (*M. g. silvestris*, AET31401), RPtGSTA1.1 (*M. g. intermedia*, AET31417), RPtGSTA1.2 (*M. g. intermedia*, AET31414), RPtGSTA1.3 (*M. g. intermedia*, AET31411), RPtGSTA2 (*M. g. intermedia*, AET31408), RPtGSTA3 (*M. g. intermedia*, AET31405), RPtGSTA4 (*M. g. intermedia*, AET31402). RPtGSTA1.1 (*M. gallopavo*, AET31418), RPtGSTA1.2 (*M. gallopavo*, AET31415), RPtGSTA1.3 (*M. gallopavo*, AET31412), RPtGSTA2 (*M. gallopavo*, AET31409), RPtGSTA3 (*M. gallopavo*, AET31406), RPtGSTA4 (*M. gallopavo*, AET31403).  
doi:10.1371/journal.pone.0060662.g003



**Table 4.** Specific GST activity and GST-mediated detoxification of AFB<sub>0</sub> by unique recombinant Alpha-class GSTs and of hepatic cytosolic from wild, heritage and domestic turkeys.

|                          | Specific enzyme activity (nmol/min/mg protein) |                           |                             |                                 |                                    |
|--------------------------|------------------------------------------------|---------------------------|-----------------------------|---------------------------------|------------------------------------|
|                          | CDNB <sup>1</sup>                              | DCNB <sup>2</sup>         | ECA <sup>3</sup>            | CHP <sup>4</sup>                | AFB <sub>1</sub> -GSH <sup>5</sup> |
| <b>Recombinant GSTAs</b> |                                                |                           |                             |                                 |                                    |
| tGSTA1.1*                | 1,674.61 ± 48.15 <sup>a</sup>                  | 16.35 ± 0.80 <sup>a</sup> | 44.31 ± 2.00 <sup>ab</sup>  | 451.83 ± 12.41 <sup>ab</sup>    | 19.54 ± 1.42 <sup>abc</sup>        |
| EWtGSTA1.1               | 850.45 ± 13.08 <sup>bc</sup>                   | 16.02 ± 0.58 <sup>a</sup> | 20.83 ± 0.48 <sup>b</sup>   | 1,977.13 ± 35.11 <sup>c</sup>   | 26.33 ± 0.89 <sup>de</sup>         |
| tGSTA1.2                 | 7,220.94 ± 75.81 <sup>d</sup>                  | 10.85 ± 0.09 <sup>b</sup> | 164.51 ± 6.18 <sup>c</sup>  | 1,076.7 ± 11.45 <sup>de</sup>   | 22.49 ± 1.97 <sup>be</sup>         |
| EWtGSTA1.2               | 2,761.94 ± 127.16 <sup>e</sup>                 | 5.70 ± 0.16 <sup>c</sup>  | 48.80 ± 1.37 <sup>ad</sup>  | 1,423.46 ± 864.02 <sup>ef</sup> | 16.59 ± 2.10 <sup>acf</sup>        |
| RGWtGSTA1.2              | 3,137.45 ± 234.93 <sup>f</sup>                 | 8.15 ± 0.61 <sup>d</sup>  | 69.92 ± 0.96 <sup>d</sup>   | 2,002.85 ± 76.44 <sup>c</sup>   | 16.62 ± 2.02 <sup>acf</sup>        |
| RPtGSTA1.2               | 3,161.92 ± 15.18 <sup>f</sup>                  | 10.60 ± 0.43 <sup>b</sup> | 95.40 ± 7.36 <sup>e</sup>   | 2,769.28 ± 150.69 <sup>g</sup>  | 21.97 ± 2.54 <sup>be</sup>         |
| tGSTA1.3                 | 1,063.48 ± 25.39 <sup>b</sup>                  | 1.46 ± 0.15 <sup>e</sup>  | 50.58 ± 0.24 <sup>ad</sup>  | 166.97 ± 68.47 <sup>a</sup>     | 21.98 ± 2.26 <sup>be</sup>         |
| RGWtGSTA1.3              | 638.89 ± 12.60 <sup>cg</sup>                   | 1.40 ± 0.05 <sup>e</sup>  | 23.61 ± 0.51 <sup>b</sup>   | 1,924.87 ± 486.10 <sup>cf</sup> | 29.10 ± 1.50 <sup>d</sup>          |
| tGSTA2                   | 3,045.23 ± 16.92 <sup>f</sup>                  | 7.55 ± 0.59 <sup>d</sup>  | 34.49 ± 0.00 <sup>ab</sup>  | 314.06 ± 7.29 <sup>a</sup>      | 21.71 ± 0.54 <sup>be</sup>         |
| RGWtGSTA2                | 1,880.01 ± 61.97 <sup>a</sup>                  | 9.31 ± 0.31 <sup>f</sup>  | 29.58 ± 0.69 <sup>ab</sup>  | 287.88 ± 7.91 <sup>a</sup>      | 21.35 ± 0.50 <sup>ab</sup>         |
| RPtGSTA2                 | 1,709.40 ± 71.87 <sup>a</sup>                  | 7.23 ± 0.24 <sup>d</sup>  | 35.85 ± 1.48 <sup>ab</sup>  | 307.90 ± 8.29 <sup>a</sup>      | 19.42 ± 0.94 <sup>abc</sup>        |
| tGSTA3                   | 4,254.39 ± 37.32 <sup>h</sup>                  | 1.25 ± 0.00 <sup>e</sup>  | 174.32 ± 1.54 <sup>c</sup>  | 850.25 ± 59.46 <sup>bd</sup>    | 18.04 ± 2.67 <sup>abf</sup>        |
| RPtGSTA3                 | 1,649.30 ± 53.04 <sup>a</sup>                  | 1.23 ± 0.21 <sup>e</sup>  | 543.28 ± 24.36 <sup>f</sup> | 1,934.90 ± 30.79 <sup>cf</sup>  | 21.42 ± 1.43 <sup>b</sup>          |
| tGSTA4                   | 302.57 ± 44.57 <sup>ji</sup>                   | 0.71 ± 0.28 <sup>e</sup>  | 21.38 ± 0.98 <sup>b</sup>   | 27.66 ± 0.45 <sup>a</sup>       | 20.06 ± 0.33 <sup>abc</sup>        |
| EWtGSTA4                 | 504.92 ± 91.97 <sup>gi</sup>                   | 0.86 ± 0.27 <sup>e</sup>  | 453.39 ± 15.09 <sup>g</sup> | 90.99 ± 3.49 <sup>a</sup>       | 14.57 ± 1.56 <sup>f</sup>          |
| RGWtGSTA4                | 251.09 ± 8.98 <sup>j</sup>                     | 1.06 ± 0.42 <sup>e</sup>  | 365.68 ± 14.88 <sup>h</sup> | 91.39 ± 3.52 <sup>a</sup>       | 16.10 ± 1.29 <sup>cf</sup>         |
| <b>Hepatic GSTs</b>      |                                                |                           |                             |                                 |                                    |
| DT                       | 1027.20 ± 17.81 <sup>a</sup>                   | 1.51 ± 0.05 <sup>a</sup>  | 89.58 ± 0.80 <sup>a</sup>   | 180.87 ± 0.97 <sup>a</sup>      | <b>n.d.</b>                        |
| EW                       | 714.09 ± 37.10 <sup>b</sup>                    | 2.21 ± 0.30 <sup>a</sup>  | 90.52 ± 3.75 <sup>a</sup>   | 209.27 ± 13.56 <sup>a</sup>     | 0.018 ± 0.004 <sup>a</sup>         |
| RGW                      | 524.14 ± 14.53 <sup>c</sup>                    | 1.59 ± 0.15 <sup>a</sup>  | 81.06 ± 1.98 <sup>a</sup>   | 159.56 ± 11.03 <sup>a</sup>     | 0.028 ± 0.007 <sup>a</sup>         |
| RP                       | 890.18 ± 43.81 <sup>a</sup>                    | 2.61 ± 0.09 <sup>a</sup>  | 94.78 ± 4.93 <sup>a</sup>   | 203.91 ± 8.50 <sup>a</sup>      | 0.017 ± 0.003 <sup>a</sup>         |
| Mouse                    | 2888.69 ± 43.98 <sup>d</sup>                   | 64.55 ± 1.10 <sup>b</sup> | 61.10 ± 0.14 <sup>b</sup>   | 805.54 ± 43.68 <sup>b</sup>     | 0.740 ± 0.013 <sup>b</sup>         |

Under each column, different superscript letters represent significant difference ( $P < 0.05$ ). (A) Recombinant GSTs were analyzed by ANOVA and post hoc LSD was used for mean separation.

<sup>1</sup>1-Chloro-2,4-dinitrobenzene; GSH (1 mM);

<sup>2</sup>1,2-Dichloro-4-nitrobenzene; GSH (5 mM);

<sup>3</sup>Ethacrynic acid; GSH (2.5 mM);

<sup>4</sup>Cumene Hydroperoxide; GSH (2 mM);

<sup>5</sup>AFB<sub>1</sub>-8,9-epoxide; GSH (5 mM); Mean ± SD of triplicate determination.

<sup>1</sup>Abbreviations are: t or DT = domestic turkey; EW = Eastern Wild; RGW = Rio Grande Wild; RP = Royal Palm standard, or "heritage" turkey.

doi:10.1371/journal.pone.0060662.t004

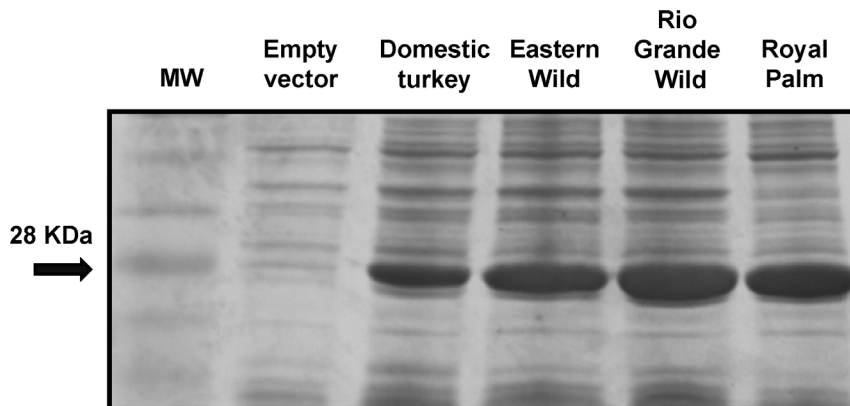

**Figure 4.** 6X His-tagged purified alpha-class turkey GSTSA1.2 separated by SDS-PAGE gel (15%), visualized by Coomassie R-250 blue. Marker: molecular weight marker (MW); Lane 1, Empty vector (negative control); Lane 2, tGSTA1.2 (domestic); Lane 3, EWtGSTA1.2 (Eastern Wild); Lane 4, RGWtGSTA1.2 (Rio Grande Wild); Lane 5, RPtGSTA1.2 (Royal Palm heritage); Lane 6.

doi:10.1371/journal.pone.0060662.g004

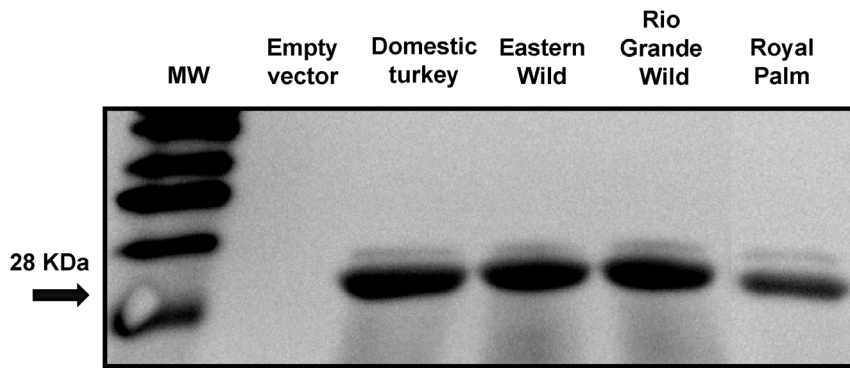

**Figure 5. Western immunoblot showing expression of His-tag recombinant purified soluble alpha-class turkey GSTA1.2.** Anti-his primary antibody and HRP-conjugated secondary antibody were used and bands were detected by chemiluminescence analysis. MW: molecular weight marker; Lane 1, Empty vector (negative control); Lane 2, tGSTA1.2 (domestic turkey); Lane 3, EWtGSTA1.2 (Eastern Wild); Lane 4, RGWtGSTA1.2 (Rio Grande Wild); Lane 5, RPtGSTA1.2 (Royal Palm heritage); Lane 6. doi:10.1371/journal.pone.0060662.g005

In this study, six alpha-class GST subunits from AFB<sub>1</sub>-resistant turkeys were cloned and expressed in *E. coli* in order to explore potential sequence differences that might affect catalytic activity of these proteins toward GST prototype substrates and toward enzymatically generated AFBO.

Domestication is a complex process, with human-animal interactions that vary considerably in terms of the degree of human intervention and the intensity of selection [33]. Genetic changes have accompanied animal domestication and breed development as domestic animals pass through severe bottlenecks during selection from wild counterparts for human benefit [34]. Significant loss of species-wide minor alleles in commercial populations is well documented [19]. A number of genetic diversity studies in chicken have reported loss of genetic diversity in commercial populations because of high selection pressure and low effective population size [35,36]. Genome-wide assessment of chicken SNP genetic diversity indicates significant absence of rare alleles (50% or more) in commercial breeds compared to ancestral breeds [19]. Whole genome SNP discovery in the turkey has identified 5.49 million putative SNPs, and comparative analyses indicate that specific haplotypes have been selected in the modern domesticated bird [37].

With a rich historic background [22], turkeys are the fourth-largest in US animal production [38], but little is known about the genetic diversities of wild ancestors compared to commercially domesticated avian species. Recent studies on the major histocompatibility complex (MHC) revealed increased haplotype variability in wild turkey as compared to domestic turkeys [39,40]. The domestic turkey is recognized as a single breed with eight different varieties defined primarily by plumage color [41,42]. Sub-specific classification of wild turkeys is supported by analysis of nuclear and mitochondrial DNA markers [43]. Phylogenetic comparison of the amino acid sequences of turkey and chicken GSTAs indicates that turkey GSTAs are orthologous to chicken GSTAs [20]. Although it has been reported that GSTA subfamilies arose from gene duplications that subsequently diverged in each species through evolution [32], our study confirmed that the *GSTA* loci in turkey and chicken were established prior to speciation.

A significant observation in this study was that hepatic cytosols from wild and heritage turkeys possessed significant catalytic detoxification capacity toward the carcinogenic intermediate AFBO, while such activity from those from domestic birds was not detectable. On the other hand, *E. coli*-expressed GSTAs

expressed from both domestic, wild and heritage breeds all possessed AFBO conjugating activity. There are many possible explanations for this observation. Down-regulation of GSTs is known to occur through a variety of mechanisms, and is often associated with variations in enzyme activity. In humans, two non-synonymous SNPs in the electrophile-binding region of GST Pi 1 (*GSTP1*) isolated from malignant gliomas appear to be associated with reduced *GSTP1*-related enzyme activity compared to normal glioma tissue [44]. Variants of GST M1, T1 and P1 were associated with reduced oxyplatin-induced neuropathy in cancer patients predictive of differences in enzyme activities related to these genes [45].

Numerous functional, allelic SNPs are known to exist within regulatory elements of human GSTAs resulting in attenuation or loss of enzyme activity [46]. Epigenetic regulation of *GSTA* gene expression or post-translational modifications may also be in play, suppressing GSTAs enzymatic activities in the livers of domestic turkeys. It is possible that artificial selection has reduced polymorphism levels [43] with significant allelic loss of hepatic GSTs in domestic commercial turkeys resulting from selective pressures on genes related to economically-desirable traits such as higher growth rates and meat production [33].

A recent study on the inheritance of epigenetic variation demonstrated a difference in the profile of brain gene expression and promoter methylation between domesticated White Leghorn layers and their wild ancestors, the Red Jungle fowl [45] speculated to be a result of either selection of genotypes affecting epigenetic states, or inheritable methylation states during chicken domestication. The mechanism of genetic and epigenetic variation and inheritance of hepatic *GSTA* gene between wild and domestic turkeys is the subject of current studies in our laboratory.

The catalytic activity of turkey GSTAs toward AFBO were substantially lower than that for mGSTA3, the “gold standard” detoxification activity used here as positive control. However, there is evidence that low expression of GSTs is functionally important in animals. For example, human hepatocytes with one or two functional *GSTM1* alleles had three-fold lower lower AFB<sub>1</sub>-DNA adducts than *GSTM1* null hepatocytes [47]. Thus, it seems reasonable that the relatively low specific activity of turkey GSTAs may well account for the observed phenotypic differences in susceptibility between wild and domestic turkeys.

In this study, neither of the synonymous mutations in *GSTA2* or *GSTA4*, nor non-synonymous mutations in *A1.1*, *1.2*, *1.3* and *A3* appeared to result in measurable differences in enzyme activities of

the *E. coli*-expressed enzymes. This observation implies that regulation of GSTAs in turkey liver also occur in regions outside the coding sequence. There is ample evidence for this in humans where hypermethylation in the promoter region of *GSTP1* results in reduced *GSTP1* expression affecting hepatocellular, breast, renal, lung, and colon cancer, as well as some lymphomas [35,48,49].

One goal of this research was to determine the extent to which wild and heritage turkeys might contain potentially useful GST alleles not found in domestic birds. As a result of the difficulties in improving AFB<sub>1</sub> resistance in domestic turkey by traditional selection, the achievement of such improvement is one of the most important applications of genome research [34,50]. We are currently investigating the transcriptome of birds following AFB<sub>1</sub> exposure and further examining the interactions of the proteins of alpha-class and other GSTs.

## Supporting Information

**Figure S1 Alignment of nucleotide sequences and positions of five single nucleotide polymorphisms (SNPs) in the coding region of hepatic  $\alpha$ -class GSTA1.1 amplified from domestic (tGSTA), Rio Grande Wild (RGWtGST), Eastern Wild (EWtGST), and Royal Palm heritage (RPtGST) turkeys (663 bp; Genbank accessions GQ228399, JN575082, JN575076, JN575088, respectively).** Periods denote identical bases for alignment. (TIFF)

**Figure S2 Alignment of nucleotide sequences and positions of seven single nucleotide polymorphisms (SNPs) in the coding region of hepatic  $\alpha$ -class GSTA1.2 amplified from domestic (tGSTA), Rio Grande Wild (RGWtGST), Eastern Wild (EWtGST), and Royal Palm heritage (RPtGST) turkeys (666 bp; Genbank accessions GQ228400, JN575083, JN575077, JN575089, respectively).** Periods denote identical bases for alignment. (TIFF)

**Figure S3 Alignment of nucleotide sequences and positions of three single nucleotide polymorphisms (SNPs) in the coding region of hepatic  $\alpha$ -class GSTA1.3**

**amplified from domestic (tGSTA), Rio Grande Wild (RGWtGST), Eastern Wild (EWtGST), and Royal Palm heritage (RPtGST) turkeys (666 bp; Genbank accessions GQ228401, JN575084, JN575078, JN575090, respectively).** Periods denote identical bases for alignment. (TIFF)

**Figure S4 Alignment of nucleotide sequences and positions of three single nucleotide polymorphisms (SNPs) in the coding region of hepatic  $\alpha$ -class GSTA2 amplified from domestic (tGSTA), Rio Grande Wild (RGWtGST), Eastern Wild (EWtGST), and Royal Palm heritage (RPtGST) turkeys (669 bp; Genbank accessions GQ228402, JN575085, JN575079, JN575091, respectively).** Periods denote identical bases for alignment. (TIFF)

**Figure S5 Alignment of nucleotide sequences and positions of one single nucleotide polymorphism (SNP) in the coding region of hepatic  $\alpha$ -class GSTA3 amplified from domestic (tGSTA), Rio Grande Wild (RGWtGST), Eastern Wild (EWtGST), and Royal Palm heritage (RPtGST) turkeys (672 bp; Genbank accessions GQ228403, JN575086, JN575080, JN575092, respectively).** Periods denote identical bases for alignment. (TIFF)

**Figure S6 Alignment of nucleotide sequences and positions of two single nucleotide polymorphism (SNP) in the coding region of hepatic  $\alpha$ -class GSTA4 amplified from domestic (tGSTA), Rio Grande Wild (RGWtGST), Eastern Wild (EWtGST), and Royal Palm heritage (RPtGST) turkeys (690 bp; Genbank accessions GQ2284042, JN575087, JN575081, JN575093, respectively).** Periods denote identical bases for alignment. (TIFF)

## Author Contributions

Conceived and designed the experiments: RC JK KR. Performed the experiments: JK BB AC KR RC. Analyzed the data: JK BB AC KR RC. Contributed reagents/materials/analysis tools: RC KR. Wrote the paper: JK BB KR RC.

## References

- Coulombe RA (1993) Biological action of mycotoxins. *J Dairy Sci* 76: 880–891.
- Klein PJ, Buckner R, Kelly J, Coulombe RA (2000) Biochemical basis for the extreme sensitivity of turkeys to aflatoxin B<sub>1</sub>. *Toxicol Appl Pharmacol* 165: 45–52.
- Liu Y, Wu F (2010) Global burden of aflatoxin-induced hepatocellular carcinoma: a risk assessment. *Environ Health Pers* 118: 818–824.
- Blount WP (1961) Turkey “X” disease. *Turkeys*: 52–77.
- Rawal S, Kim JE, Coulombe R (2010) Aflatoxin B<sub>1</sub> in poultry: Toxicology, metabolism and prevention. *Res Vet Sci* 89: 325–331.
- Rawal S, Coulombe RA (2011) Metabolism of aflatoxin B<sub>1</sub> in Turkey liver microsomes: The relative roles of cytochromes P450 1A5 and 3A37. *Toxicology and Applied Pharmacology* 254: 349–354.
- Rawal S, Mendoza KM, Reed KM, Coulombe RA (2009) Structure, genetic mapping, and function of the cytochrome P450 3A37 gene in the turkey (*Meleagris gallopavo*). *Cytogenet Genome Res* 125: 67–73.
- Rawal S, Yip SS, Coulombe RA (2010) Cloning, expression and functional characterization of cytochrome P450 3A37 from turkey liver with high aflatoxin B<sub>1</sub> epoxidation activity. *Chem Res Toxicol* 23: 1322–1329.
- Hayes JD, Flanagan JU, Jowsey IR (2005) Glutathione transferases. *Annu Rev Pharmacol Toxicol* 45: 51–88.
- Hayes JD, Pulford DJ (1995) The glutathione S-transferase supergene family: regulation of GST and the contribution of the isoenzymes to cancer chemoprotection and drug resistance. *Crit Rev Biochem Mol Biol* 30: 445–600.
- Eaton DL, Gallagher EP (1994) Mechanisms of aflatoxin carcinogenesis. *Annu Rev Pharmacol Toxicol* 34: 135–172.
- Ilic Z, Crawford D, Vakharia D, Egner PA, Sell S (2010) Glutathione-S-transferase A3 knockout mice are sensitive to acute cytotoxic and genotoxic effects of aflatoxin B<sub>1</sub>. *Toxicol Appl Pharmacol* 242: 241–246.
- Eaton DL, Bammler TK (1999) Concise review of the glutathione S-transferases and their significance to toxicology. *Toxicol Sci* 49: 156–164.
- Klein PJ, Van Vleet TR, Hall JO, Coulombe RA (2002) Biochemical factors underlying the age-related sensitivity of turkeys to aflatoxin B<sub>1</sub>. *Comp Biochem Physiol C Toxicol Pharmacol* 132: 193–201.
- Klein PJ, Van Vleet TR, Hall JO, Coulombe RA (2002) Dietary butylated hydroxytoluene protects against aflatoxicosis in Turkeys. *Toxicol Appl Pharmacol* 182: 11–19.
- Klein PJ, Van Vleet TR, Hall JO, Coulombe RA (2003) Effects of dietary butylated hydroxytoluene on aflatoxin B<sub>1</sub>-relevant metabolic enzymes in turkeys. *Food Chem Toxicol* 41: 671–678.
- Quist CF, Bounous DI, Kilburn JV, Nettles VF, Wyatt RD (2000) The effect of dietary aflatoxin on wild turkey poults. *J Wildl Dis* 36: 436–444.
- Cho HR, Uhm YK, Kim HJ, Ban JY, Chung JH, et al. (2011) Glutathione S-transferase M1 (GSTM1) polymorphism is associated with atopic dermatitis susceptibility in a Korean population. *Int. J. Immunogenet* 38: 145–150.
- Muir WM, Wong GK, Zhang Y, Wang J, Groenen MA, et al. (2008) Genome-wide assessment of worldwide chicken SNP genetic diversity indicates significant absence of rare alleles in commercial breeds. *Proc Natl Acad Sci U S A*. 105: 17312–17317.
- Kim JE, Bauer MM, Mendoza KM, Reed KM, Coulombe RA, Jr. (2010) Comparative genomics identifies new alpha class genes within the avian glutathione S-transferase gene cluster. *Gene* 452: 45–53.

21. Kim JE, Bunderson BR, Croasdell A, Coulombe RA (2011) Functional characterization of alpha-class glutathione s-transferases from the Turkey (*Meleagris gallopavo*). *Toxicol Sci* 124: 45–53.
22. Reed KM (2009) Turkey. Berlin Heidelberg: Springer-Verlag. 143–163.
23. Tamura K, Peterson D, Peterson N, Stecher G, Nei M, et al. (2011) MEGA5: molecular evolutionary genetics analysis using maximum likelihood, evolutionary distance, and maximum parsimony methods. *Mol Biol Evol* 28: 2731–2739.
24. Habig WH, Pabst MJ, Jakoby WB (1974) Glutathione S-Transferase. *J Biol Chem* 249: 7130–7139.
25. Habig WH, Jakoby WB (1981) Assays for differentiation of glutathione S-transferases. *Methods Enzymol* 77: 398–405.
26. Lawrence RA, Burk RF (1976) Glutathione peroxidase activity in selenium-deficient rat liver. *Biochemical and biophysical research communications* 71: 952–958.
27. Guarisco JA, Hall JO, Coulombe RA (2008) Mechanisms of butylated hydroxytoluene chemoprevention of aflatoxicosis—inhibition of aflatoxin B1 metabolism. *Toxicol Appl Pharmacol* 227: 339–346.
28. Guarisco JA, Hall JO, Coulombe RA (2008) Butylated hydroxytoluene chemoprevention of aflatoxicosis - effects on aflatoxin B1 bioavailability, hepatic DNA adduct formation, and biliary excretion. *Food Chem Toxicol* 46: 3727–3731.
29. Low WY, Ng HL, Morton CJ, Parker MW, Batterham P, et al. (2007) Molecular evolution of glutathione S-transferases in the genus *Drosophila*. *Genetics* 177: 1363–1375.
30. Borroz KI, Ramsdell HS, Eaton DL (1991) Mouse strain differences in glutathione S-transferase activity and aflatoxin B1 biotransformation. *Toxicology Letters* 58: 97–105.
31. Yip SS, Coulombe RA (2006) Molecular cloning and expression of a novel cytochrome P450 from Turkey liver with aflatoxin B1 oxidizing activity. *Chem Res Toxicol* 19: 30–37.
32. Schweitzer SH, Quist CF, Grimes GL, Forest DL (2001) Aflatoxin levels in corn available as wild turkey feed in Georgia. *J Wildl Dis* 37: 657–659.
33. Speller CF, Kemp BM, Wyatt SD, Monroe C, Lipe WD, et al. (2010) Ancient mitochondrial DNA analysis reveals complexity of indigenous North American turkey domestication. *Proc Natl Acad Sci U S A* 107: 2807–2812.
34. Soller M, Andersson L (1998) Genomic approaches to the improvement of disease resistance in farm animals. *Rev Sci Tech* 17: 329–345.
35. Lee JS (2007) GSTP1 promoter hypermethylation is an early event in breast carcinogenesis. *Virchows Archiv* 450: 637–642.
36. Estep JE, Lame MW, Segall HJ (1990) Excretion and blood radioactivity levels following [<sup>14</sup>C]sencenionine administration in the rat. *Toxicology* 64: 179–189.
37. Aslam ML, Bastiaansen JW, Elferink MG, Megens HJ, Crooijmans RP, et al. (2012) Whole genome SNP discovery and analysis of genetic diversity in Turkey (*Meleagris gallopavo*). *BMC Genomics* 13: 391.
38. United States Department of Agriculture (2011) National Agricultural Statistics Service.
39. Chaves LD, Faile GM, Hendrickson JA, Mock KE, Reed KM (2011) A locus-wide approach to assessing variation in the avian MHC: the B-locus of the wild turkey. *Heredity (Edinb)* 107: 40–49.
40. Chaves LD, Faile GM, Krueth SB, Hendrickson JA, Reed KM (2010) Haplotype variation, recombination, and gene conversion within the turkey MHC-B locus. *Immunogenetics* 62: 465–477.
41. Smith EJ, Geng T, Long E, Pierson FW, Sponenberg DP, et al. (2005) Molecular analysis of the relatedness of five domesticated turkey strains. *Biochem Genet* 43: 35–47.
42. Hartman S, Taleb SA, Geng T, Gyenai K, Guan X, et al. (2006) Comparison of plasma uric acid levels in five varieties of the domestic turkey, *Meleagris gallopavo*. *Poult Sci* 85: 1791–1794.
43. Mock KE, Theimer TC, Rhodes OE, Greenberg DL, Keim P (2002) Genetic variation across the historical range of the wild turkey (*Meleagris gallopavo*). *Mol Ecol* 11: 643–657.
44. Ali-Osman F, Akande O, Antoun G, Mao JX, Buolamwini J (1997) Molecular cloning, characterization, and expression in *Escherichia coli* of full-length cDNAs of three human glutathione S-transferase P1 gene variants. Evidence for differential catalytic activity of the encoded proteins. *J Biol Chem* 272: 10004–10012.
45. Lecomte T, Landi B, Beaune P, Laurent-Puig P, Loriot MA (2006) Glutathione S-transferase P1 polymorphism (Ile105Val) predicts cumulative neuropathy in patients receiving oxaliplatin-based chemotherapy. *Clin Cancer Res* 12: 3050–3056.
46. Coles BF, Kadlubar FF (2005) Human alpha class glutathione S-transferases: genetic polymorphism, expression, and susceptibility to disease. *Methods Enzymol* 401: 9–42.
47. Gross-Steinmeyer K, Stapleton PL, Tracy JH, Bammler TK, Strom SC, et al. (2010) Sulforaphane- and phenethyl isothiocyanate-induced inhibition of aflatoxin B1-mediated genotoxicity in human hepatocytes: role of GSTM1 genotype and CYP3A4 gene expression. *Toxicol Sci* 116: 422–432.
48. Esteller M, Corn PG, Urena JM, Gabrielson E, Baylin SB, et al. (1998) Inactivation of glutathione S-transferase P1 gene by promoter hypermethylation in human neoplasia. *Cancer research* 58: 4515–4518.
49. Zhong S, Tang MW, Yeo W, Liu C, Lo YM, et al. (2002) Silencing of GSTP1 gene by CpG island DNA hypermethylation in HBV-associated hepatocellular carcinomas. *Clin Cancer Res* 8: 1087–1092.
50. Andersson L (2001) Genetic dissection of phenotypic diversity in farm animals. *Nat Rev Genet* 2: 130–138.
